# Supplementary material for: Effects of radial radio-frequency field inhomogeneity on MAS solid-state NMR experiments
Source: Copernicus journal article supplement (doi:10.5194/mr-2021-43), 2021-05-07
Supplement: Supplementary file 1 [file mr-2021-43-supplement.pdf]

## S1 Second-order scaling factors

Expressions for second-order scaling factors for  $\chi = y$

$$q_y^{(n_1, n_2)} = \sum_{\nu, \lambda} \frac{1}{\nu\omega_m + \lambda\omega_{\text{eff}}} \left( a_z^{(-\nu-c\cdot n_1, -\lambda)} a_x^{(\nu-c\cdot n_2, \lambda)} - a_x^{(-\nu-c\cdot n_1, -\lambda)} a_z^{(\nu-c\cdot n_2, \lambda)} \right), \quad (\text{S1})$$

$$5 \quad q_{y, \mu}^{(n_1, n_2)} = \sum_{\nu, \lambda} \frac{1}{\nu\omega_m + \lambda\omega_{\text{eff}}} \left( a_z^{(-\nu-c\cdot n_1, -\lambda)} a_{x\mu}^{(\nu-c\cdot n_2, \lambda)} - a_x^{(-\nu-c\cdot n_1, -\lambda)} a_{z\mu}^{(\nu-c\cdot n_2, \lambda)} \right. \\ \left. - a_z^{(\nu-c\cdot n_1, \lambda)} a_{x\mu}^{(-\nu-c\cdot n_2, -\lambda)} + a_x^{(\nu-c\cdot n_1, \lambda)} a_{z\mu}^{(-\nu-c\cdot n_2, -\lambda)} \right), \quad (\text{S2})$$

$$p_y^{(n_1, n_2)} = \sum_{\mu} \sum_{\nu, \lambda} \frac{1}{\nu\omega_m + \lambda\omega_{\text{eff}}} \left( a_{z\mu}^{(-\nu-c\cdot n_1, -\lambda)} a_{x\mu}^{(\nu-c\cdot n_2, \lambda)} - a_{x\mu}^{(-\nu-c\cdot n_1, -\lambda)} a_{z\mu}^{(\nu-c\cdot n_2, \lambda)} \right), \quad (\text{S3})$$

$$10 \quad p_{\mu y \xi}^{(n_1, n_2)} = \sum_{\nu, \lambda} \frac{1}{\nu\omega_m + \lambda\omega_{\text{eff}}} \left( a_{\mu z}^{(-\nu-c\cdot n_1, -\lambda)} a_{x\xi}^{(\nu-c\cdot n_2, \lambda)} - a_{\mu z}^{(\nu-c\cdot n_1, \lambda)} a_{x\xi}^{(-\nu-c\cdot n_2, -\lambda)} \right. \\ \left. - a_{\mu x}^{(-\nu-c\cdot n_1, -\lambda)} a_{z\xi}^{(\nu-c\cdot n_2, \lambda)} + a_{\mu x}^{(\nu-c\cdot n_1, \lambda)} a_{z\xi}^{(-\nu-c\cdot n_2, -\lambda)} \right). \quad (\text{S4})$$

Expressions for second-order scaling factors for  $\chi = z$

$$q_z^{(n_1, n_2)} = \sum_{\nu, \lambda} \frac{1}{\nu\omega_m + \lambda\omega_{\text{eff}}} \left( a_x^{(-\nu-c\cdot n_1, -\lambda)} a_y^{(\nu-c\cdot n_2, \lambda)} - a_y^{(-\nu-c\cdot n_1, -\lambda)} a_x^{(\nu-c\cdot n_2, \lambda)} \right), \quad (\text{S5})$$

$$15 \quad q_{y, \mu}^{(n_1, n_2)} = \sum_{\nu, \lambda} \frac{1}{\nu\omega_m + \lambda\omega_{\text{eff}}} \left( a_x^{(-\nu-c\cdot n_1, -\lambda)} a_{y\mu}^{(\nu-c\cdot n_2, \lambda)} - a_y^{(-\nu-c\cdot n_1, -\lambda)} a_{x\mu}^{(\nu-c\cdot n_2, \lambda)} \right. \\ \left. - a_x^{(\nu-c\cdot n_1, \lambda)} a_{y\mu}^{(-\nu-c\cdot n_2, -\lambda)} + a_y^{(\nu-c\cdot n_1, \lambda)} a_{x\mu}^{(-\nu-c\cdot n_2, -\lambda)} \right), \quad (\text{S6})$$

$$p_z^{(n_1, n_2)} = \sum_{\mu} \sum_{\nu, \lambda} \frac{1}{\nu\omega_m + \lambda\omega_{\text{eff}}} \left( a_{x\mu}^{(-\nu-c\cdot n_1, -\lambda)} a_{y\mu}^{(\nu-c\cdot n_2, \lambda)} - a_{y\mu}^{(-\nu-c\cdot n_1, -\lambda)} a_{x\mu}^{(\nu-c\cdot n_2, \lambda)} \right), \quad (\text{S7})$$

$$20 \quad p_{\mu z \xi}^{(n_1, n_2)} = \sum_{\nu, \lambda} \frac{1}{\nu\omega_m + \lambda\omega_{\text{eff}}} \left( a_{\mu x}^{(-\nu-c\cdot n_1, -\lambda)} a_{y\xi}^{(\nu-c\cdot n_2, \lambda)} - a_{\mu x}^{(\nu-c\cdot n_1, \lambda)} a_{y\xi}^{(-\nu-c\cdot n_2, -\lambda)} \right. \\ \left. - a_{\mu y}^{(-\nu-c\cdot n_1, -\lambda)} a_{x\xi}^{(\nu-c\cdot n_2, \lambda)} + a_{\mu y}^{(\nu-c\cdot n_1, \lambda)} a_{x\xi}^{(-\nu-c\cdot n_2, -\lambda)} \right). \quad (\text{S8})$$

## S2 Simulation Parameters

**Table S1.** Parameters used in numerical simulations of the MAS experiments presented in the main text. The number of crystallite orientations used for the ZCW (Cheng et al., 1973) powder averaging is denoted by  $N_p$ . Unless noted otherwise, all simulations were performed at an external static magnetic field of  $B_0 = 14.1$  T, corresponding to a proton resonance frequency of 600 MHz.

| Experiment              | Figure            | Probe  | MAS [kHz] | $N_p$ | Spin | $\omega_{1,\text{nom}}$ [kHz]                |
|-------------------------|-------------------|--------|-----------|-------|------|----------------------------------------------|
| Nutation                | 3a                | 3.2 mm | 30        | 1     | H    | 100                                          |
|                         | 3b                | 3.2 mm | 15        | 1     | H    | 100                                          |
|                         | 3c                | 1.3 mm | 30        | 1     | H    | 100                                          |
|                         | 3d                | 1.3 mm | 15        | 1     | H    | 100                                          |
|                         | S1                | 3.2 mm | 30        | 1     | H    | 100                                          |
|                         | S2b               | 3.2 mm | 15        | 100   | HH   | 100                                          |
| CP                      | 6                 | 3.2 mm | 20        | 1154  | CN   | $^{13}\text{C}: 85$ ; $^{15}\text{N}: 65$    |
|                         | 6                 | 3.2 mm | 20        | 1154  | HN   | $^1\text{H}: 70$ ; $^{15}\text{N}: 50$       |
|                         | 6                 | 3.2 mm | 20        | 1154  | HC   | $^1\text{H}: 90$ ; $^{13}\text{C}: 70$       |
| tmSPICE CP <sup>1</sup> | 7                 | 3.2 mm | 20        | 1154  | NC   | $^{15}\text{N}: 40$ ; $^{13}\text{C}: 40$    |
| REDOR                   | 8a                | 1.3 mm | 20        | 538   | CN   | $^{13}\text{C}: 100$ ; $^{15}\text{N}: 62.5$ |
|                         | 8b & S5a          | 3.2 mm | 20        | 538   | CN   | $^{13}\text{C}: 62.5$ ; $^{15}\text{N}: 50$  |
|                         | 8c                | 1.9 mm | 40        | 10000 | HN   | $^1\text{H}: 125$ ; $^{15}\text{N}: 50$      |
|                         | 8d                | 1.9 mm | 40        | 10000 | HN   | $^1\text{H}: 125$ ; $^{15}\text{N}: 50$      |
| C7 and PC7              | 9a-d              | 3.2 mm | 10        | 538   | CC   | 70                                           |
|                         | 9e-f <sup>2</sup> | 3.2 mm | 10        | 538   | CC   | 70                                           |
| FSLG                    | 10                | 3.2 mm | 12.5      | 1154  | HHH  | 125 (along $\theta_m$ )                      |
|                         | S6                | 3.2 mm | ca. 14.1  | 1154  | HHH  | 125 (along $\theta_m$ )                      |

<sup>1</sup> Simulations at a  $B_0$ -field of 9.4 T, corresponding to a proton resonance frequency of 400 MHz.

<sup>2</sup> Simulations at a  $B_0$ -field of 7.0 T, corresponding to a proton resonance frequency of 300 MHz.

## S2.1 Spin System Parameters

**Table S2.** Input parameters for CSA tensors used in tmSPICE CP simulations of NCA and NCO polarization transfers at a proton resonance frequency of 400 MHz. Spin 0 corresponds to  $^{15}\text{N}$ , spin 1 corresponds to  $^{13}\text{C}$ . Euler angles  $\alpha, \beta, \gamma$  are given in degree.

| Spin System | Spin | $a_{\text{iso}}^{\text{CSA}}$ [Hz] | $\delta^{\text{CSA}}$ [Hz] | $\eta^{\text{CSA}}$ | Relative tensor orientation ( $\alpha, \beta, \gamma$ ) |
|-------------|------|------------------------------------|----------------------------|---------------------|---------------------------------------------------------|
| NCA         | 0    | 0.0                                | 3960.0                     | 0.19                | ( 103.01, -141.57, 65.13 )                              |
|             | 1    | 0.0                                | -2000.0                    | 0.43                | ( -81.06, 37.80, 37.44 )                                |
| NCO         | 0    | 0.0                                | 3960.0                     | 0.19                | ( 103.01, -141.57, 65.13 )                              |
|             | 1    | 0.0                                | -7600.0                    | 0.90                | ( 100.87, -127.26, -131.30 )                            |

**Table S3.** Scalar  $J$ -couplings  $J_{IS}$ , anisotropies  $\delta_{IS}$  and the orientation of the dipolar coupling tensors used in simulations of tmSPICE NCA and NCO polarization transfers at a proton resonance frequency of 400 MHz. Euler angles  $\alpha, \beta, \gamma$  are given in degree.

| Spin pair  | $J_{IS}$ [Hz] | $\frac{\delta_{IS}}{2\pi}$ [Hz] | Relative tensor orientation ( $\alpha, \beta, \gamma$ ) |
|------------|---------------|---------------------------------|---------------------------------------------------------|
| NCA (0, 1) | -11           | 2038.34                         | ( 0.0, 63.76, 113.83 )                                  |
| NCO (0, 1) | -15           | 2698.98                         | ( 0.0, 72.69, -27.58 )                                  |

**Table S4.** Input parameters for CSA tensors used in C7 and PC7 simulations of a homonuclear CC two-spin system based on phthalic acid (Hellwagner et al., 2017) at a carbon resonance frequency of 75 MHz. Euler angles  $\alpha, \beta, \gamma$  are given in degree.

| Spin | $a_{\text{iso}}^{\text{CSA}}$ [Hz] | $\delta^{\text{CSA}}$ [Hz] | $\eta^{\text{CSA}}$ | Relative tensor orientation ( $\alpha, \beta, \gamma$ ) |
|------|------------------------------------|----------------------------|---------------------|---------------------------------------------------------|
| 0    | -300                               | -5775                      | 0.69                | ( 90, 70, 10 )                                          |
| 1    | 300                                | 5775                       | 0.69                | ( 90, 110, 70 )                                         |

**Table S5.** Input parameters for CSA tensors used in FSLG simulations of a dipolar coupled three proton spin system at a resonance frequency of 600 MHz. Parameters are inspired by glycine. Euler angles  $\alpha, \beta, \gamma$  are given in degree.

| Spin | $a_{\text{iso}}^{\text{CSA}}$ [Hz] | $\delta^{\text{CSA}}$ [Hz] | $\eta^{\text{CSA}}$ | Relative tensor orientation ( $\alpha, \beta, \gamma$ ) |
|------|------------------------------------|----------------------------|---------------------|---------------------------------------------------------|
| 0    | 1932                               | 2100                       | 0.80                | ( 0, 30.59, 147.04 )                                    |
| 1    | 2508                               | -2974.8                    | 0.751               | ( -54.76, 109.2, 96.18 )                                |
| 2    | 4752                               | 2085.6                     | 0.998               | ( -17.82, 103.4, 78.42 )                                |

**Table S6.** Anisotropy  $\delta_{IS}$  and the relative orientation of the dipolar coupling tensors used in FSLG simulations of a three proton spin system at a resonance frequency of 600 MHz. Scalar  $J$ -couplings were set to zero. Parameters are inspired by glycine. Euler angles  $\alpha, \beta, \gamma$  are given in degree.

| Spin pair | $\frac{\delta_{IS}}{2\pi}$ [Hz] | Relative tensor orientation ( $\alpha, \beta, \gamma$ ) |
|-----------|---------------------------------|---------------------------------------------------------|
| (0, 1)    | -52245                          | ( 0, 70.77, 120.47 )                                    |
| (0, 2)    | -13595                          | ( 134.37, 96.59, 14.88 )                                |
| (1, 2)    | -13387                          | ( -105.82, 85.98, 47.20 )                               |

### S3 Nutation Spectra

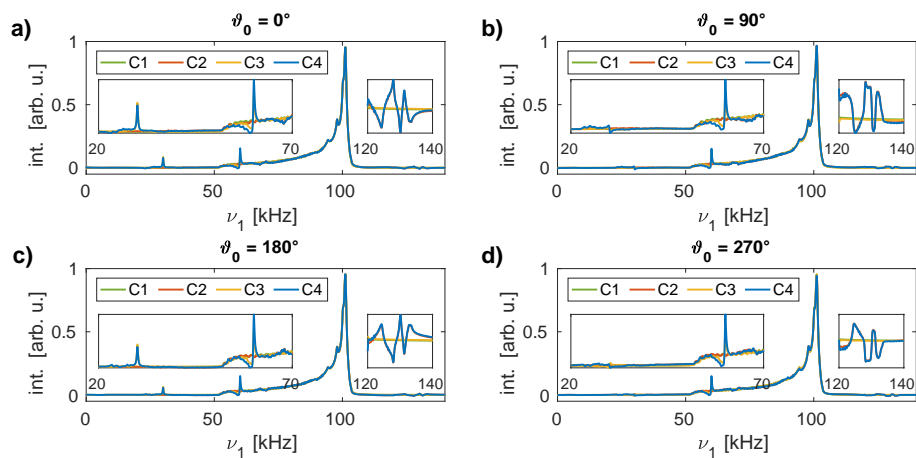

**Figure S1.** Simulated nutation spectra at a resonance frequency of 600 MHz for the 3.2 mm MAS probe assuming a spinning frequency of 30 kHz and a nominal rf amplitude of 100 kHz. Shown are spectra of  $rz$ -planes with initial  $\vartheta_0$  values of  $0^\circ$  (a),  $90^\circ$  (b),  $180^\circ$  (c) and  $270^\circ$  (d). The initial orientation only influences the phases of the sidebands arising due to the MAS modulation of the rf amplitude and phase.

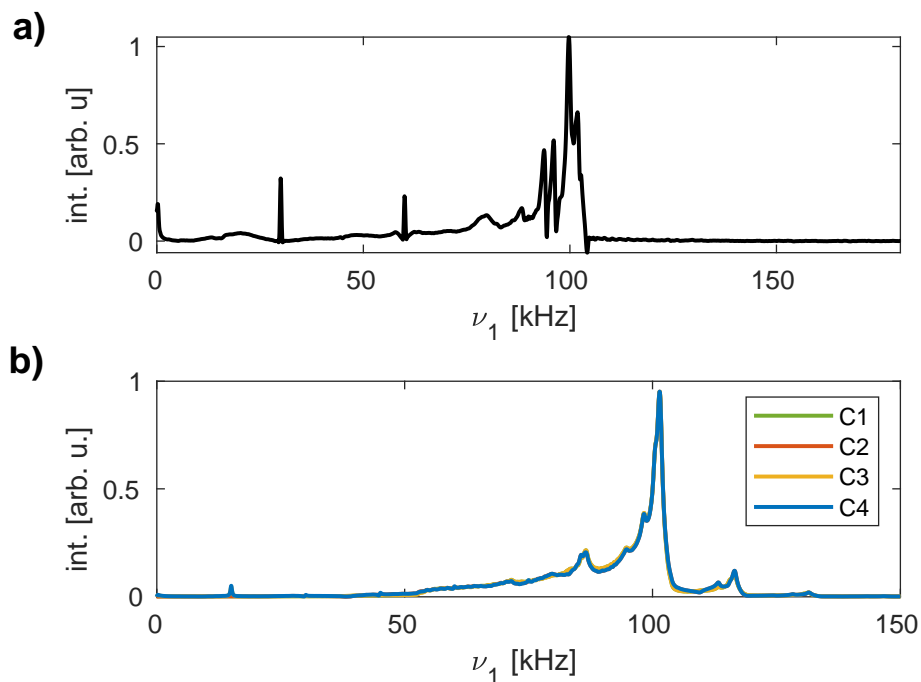

**Figure S2.** a) Experimental  $^1\text{H}$  nutation spectrum of natural-abundance adamantane recorded at a proton resonance frequency of 500 MHz in a Bruker 1.9 mm MAS probe spinning at 30 kHz. The nominal rf amplitude was set to 100 kHz as calibrated using a nutation spectrum. As was seen in the experimental nutation spectra of glycine in Fig. 4 in the main text, sidebands due to MAS modulation of the rf phase arise at 30 and 60 kHz. However, no sideband is observed at 130 kHz which is consistent with the observations made in simulated nutation spectra of single-spin systems (s. Fig. 3 in the main text). b) Simulated nutation spectrum of a dipolar coupled two-spin system ( $\frac{\delta I_S}{2\pi} = 50$  kHz, scalar  $J$ -couplings and chemical shifts set to zero) at a resonance frequency of 600 MHz for the 3.2 mm MAS probe assuming a spinning frequency of 15 kHz and a nominal rf amplitude of 100 kHz for C1–C4. In comparison to the simulated single-spin spectra (s. Fig. 3 in the main text), significantly stronger sidebands at  $\nu_1 \pm n \cdot \nu_r$  arise for all four cases. The shape of this sideband replicates the main nutation profile. This agrees with the observations made in the experimental nutation spectra of glycine shown in Fig. 4 in the main text.

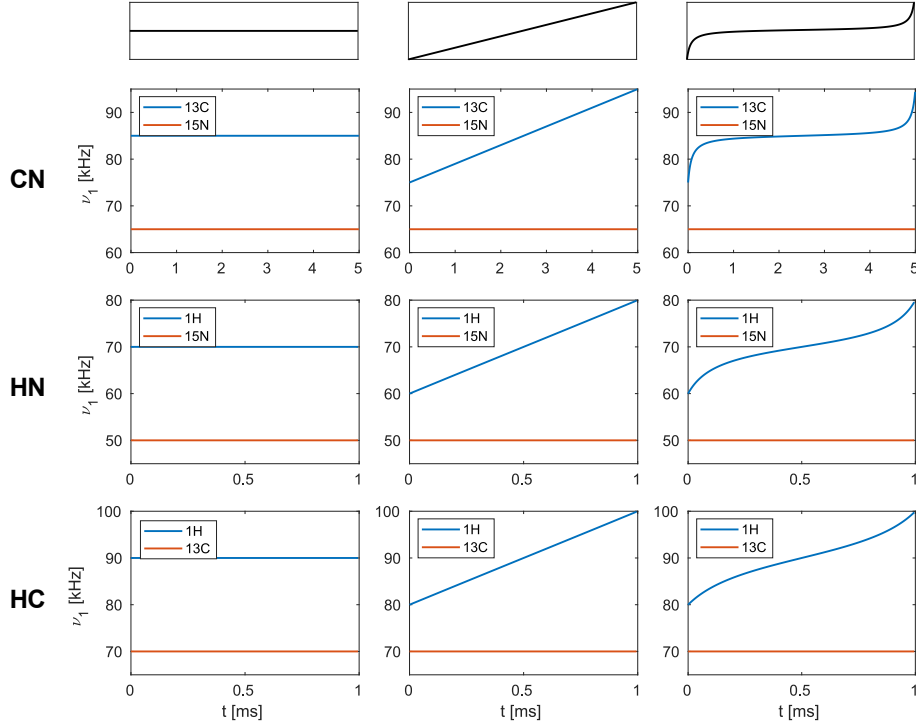

**Figure S3.** Nominal rf-field amplitude modulations for simulated CP polarization transfers in CN (top row), HN (middle row) and HC (bottom row) spin pairs. Transfers were simulated assuming a MAS frequency of 20 kHz.

In the numerical simulations of adiabatic passage CP, the shape of the amplitude modulation during the contact time  $\tau$  on one of the channels was chosen to be of the following form

$$\chi^\Delta(t) = |\omega_{\text{IS}}^{\text{est}}| \tan\left(\alpha \cdot \left[\frac{\tau}{2} - t\right]\right), \quad (\text{S9})$$

where the time-dependent mismatch  $\chi^\Delta$  is defined as  $\chi^\Delta(t) = \omega_{\text{II}}(t) - \omega_{\text{IS}} - n\omega_{\text{r}}$  and the parameter  $\alpha$  given by

$$30 \quad \alpha = \frac{2}{\tau} \arctan\left(\frac{\chi_i^\Delta}{|\omega_{\text{IS}}^{\text{est}}|}\right). \quad (\text{S10})$$

$\chi_i^\Delta$  corresponds to the initial offset from the matching condition and was set to -10 kHz in all simulations. The steepness is determined by the estimated dipolar coupling constant  $|\omega_{\text{IS}}^{\text{est}}|$ . The nominal rf amplitude on the other channel was kept constant during the contact time. Estimated anisotropies of the dipolar coupling  $\frac{\delta_{\text{IS}}}{2\pi}$  of 475, 3125 and 5750 Hz were used for CN, HN and HC spin pairs respectively.

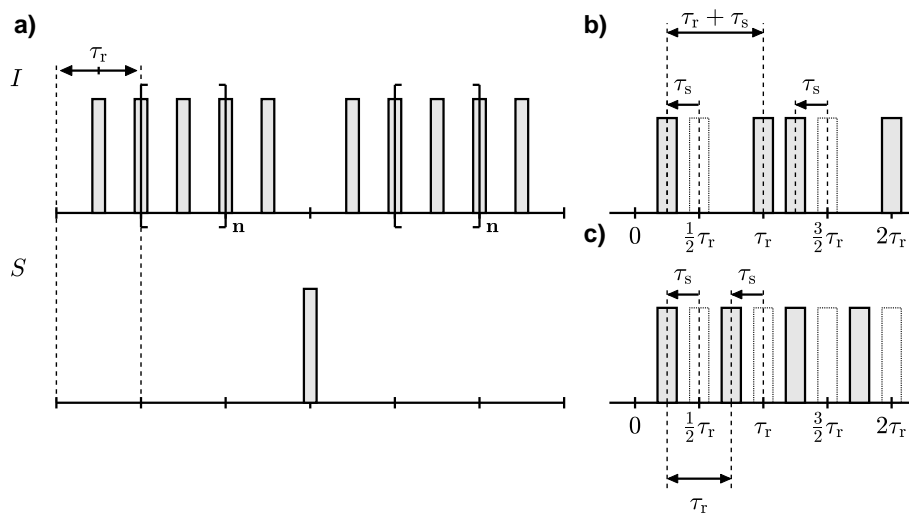

**Figure S4.** a) Schematic representation of the pulse sequence for the standard REDOR implementation. In the basic building block, the two  $\pi$  pulses are separated by half a rotor period  $\tau_r$ . Signal detection occurs on the  $S$ -spin channel after integer multiples of the cycle time. b) REDOR implementation where the  $\pi$  pulse at  $\frac{\tau_r}{2}$  is shifted in time by  $\tau_s$  (Gullion and Schaefer, 1989b). c) REDOR implementation where both  $\pi$  pulses in the basic building block are shifted. The time interval between consecutive pulses is kept constant at  $\frac{\tau_r}{2}$  (Jain et al., 2019). In both implementations, pulses are shifted in a mirror symmetric way during the second half of the pulse sequence.

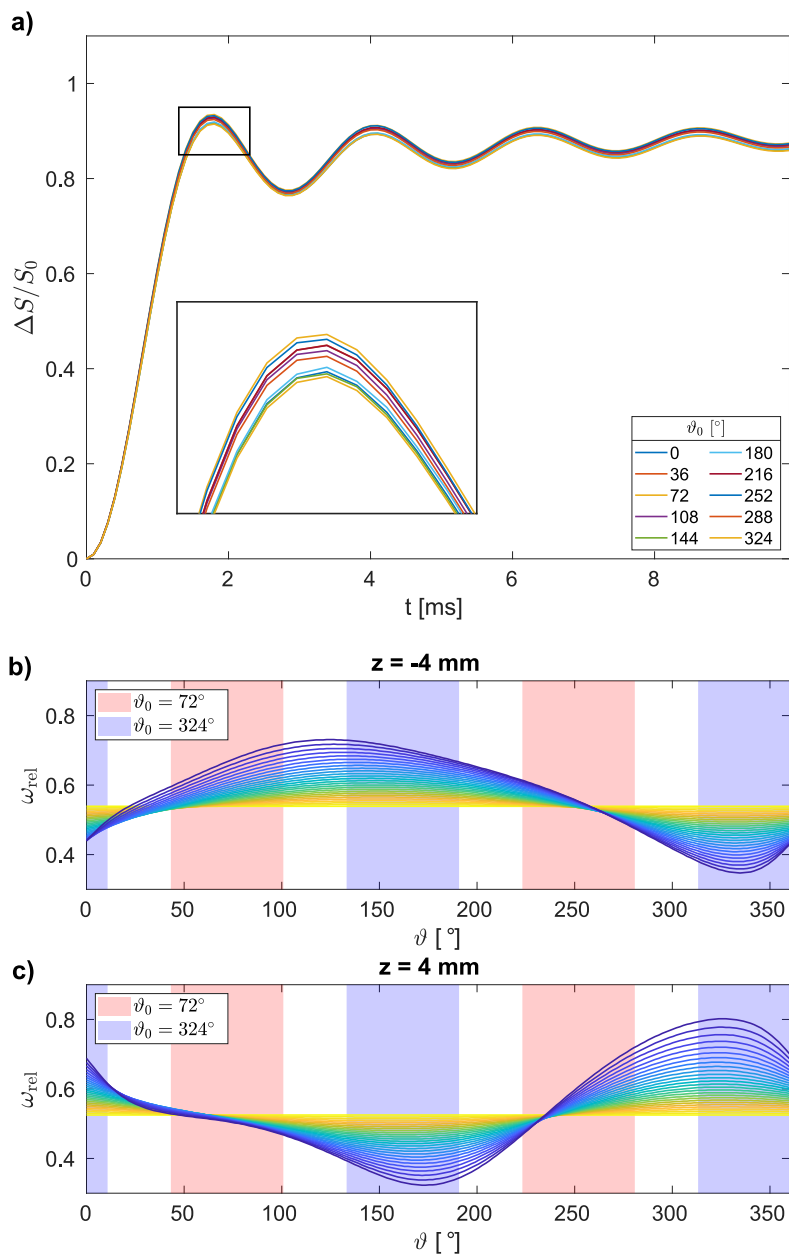

**Figure S5.** a) Simulated REDOR curves (C4 only) for a CN spin pair (anisotropy of the dipolar coupling of  $\frac{\delta I_S}{2\pi} = 2$  kHz) for  $rz$ -planes at different  $\vartheta_0$  in a 3.2 mm MAS probe. Simulation parameters are the same as for the results shown in Fig. 8b in the main text. Slight differences in the recoupling efficiencies are observed depending on the initial  $\vartheta_0$  value. However, these differences are only marginal. b) / c) Rf amplitude trajectories as a function of  $\vartheta$  for  $z = -4$  (b) and 4 mm (c) for all 27  $r$  values (from  $r_{min} = 0$  mm in yellow to  $r_{max} = 1.3$  mm in blue). The positions of the  $\pi$  pulses for  $rz$ -planes which showed maximum ( $\vartheta_0 = 72^\circ$ ) and minimum ( $\vartheta_0 = 324^\circ$ ) recoupling efficiency (a) are indicated by the areas shaded in red and blue. The slightly higher recoupling efficiency observed for  $\vartheta_0 = 72^\circ$  observed can be explained by the timing of pulses such that they occur during intervals where the rf amplitude does not experience large rf amplitude modulations.



## S6 Frequency-Switched Lee-Goldburg

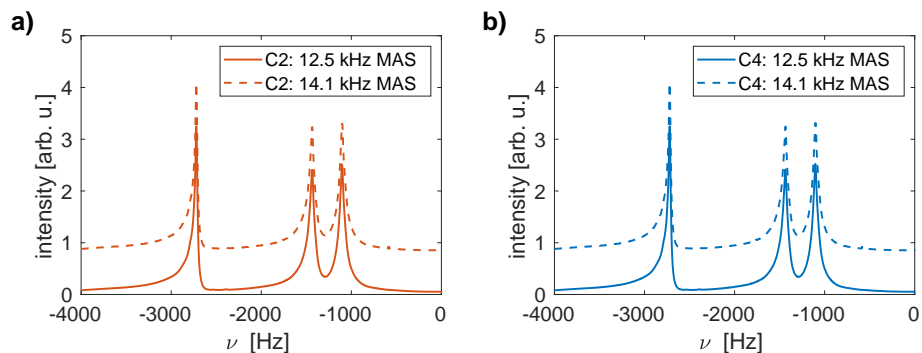

**Figure S6.** Simulated FSLG decoupled homonuclear spectra of a three-spin system at a resonance frequency of 600 MHz for the 3.2 mm MAS probe. The effective field strength along the magic angle was set to 125 kHz. Shown are cases where rf amplitude modulations were taken into account (C2 in a, C4 in b). In these cases broadening was observed in the simulated spectra shown in the main text in Fig. 10. In addition to the synchronous implementation of the FSLG decoupling assuming a MAS frequency of 12.5 kHz an asynchronous implementation assuming a MAS frequency of approximately 14.1 kHz is shown (with a  $y$ -offset for better visualization). The same broadening is observed for both implementations and can thus be attributed to the rf amplitude modulations due to the radial rf inhomogeneity instead of potential resonant effects.

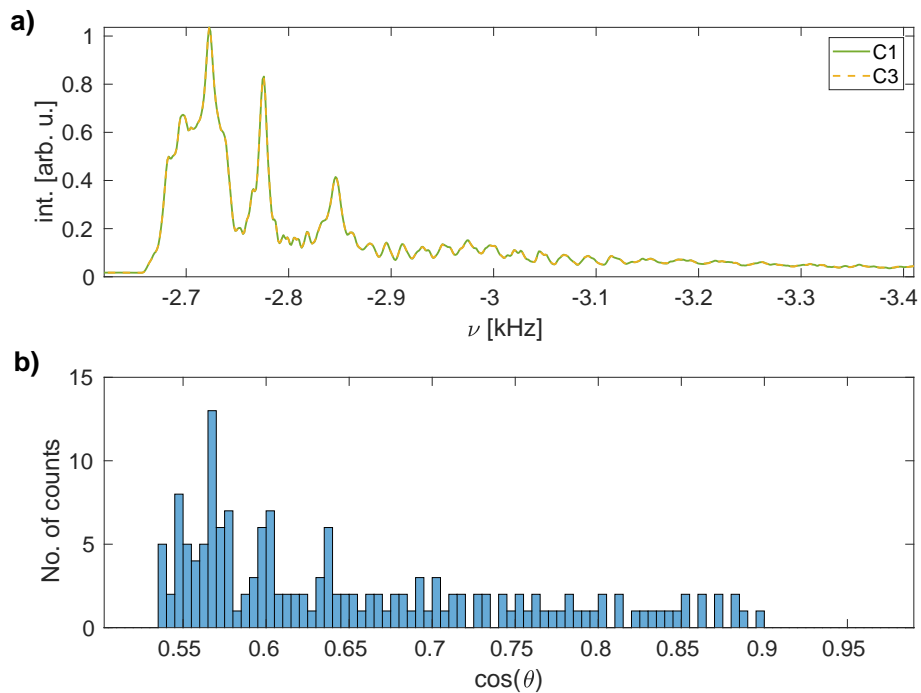

**Figure S7.** a) Detail of the observed line splitting for C1 and C3 in the contribution of the radial slice at  $r = 1.3$  mm to the simulated FSLG decoupled spectra as shown in Fig. 10c in the main text. b) Histogram of the distribution of the isotropic chemical-shift scaling factors  $\cos(\theta)$  (with  $\theta$  being the angle between the effective field and the  $z$ -axis computed as  $\sin(\theta) = \frac{\nu_{1,\text{nom}} \cdot \bar{\nu}_{1,\text{rel}}}{\nu_{\text{eff}}}$  for each volume element in this radial slice) for the radial slice at  $r = 1.3$  mm. The observed splitting is in good agreement with this distribution.

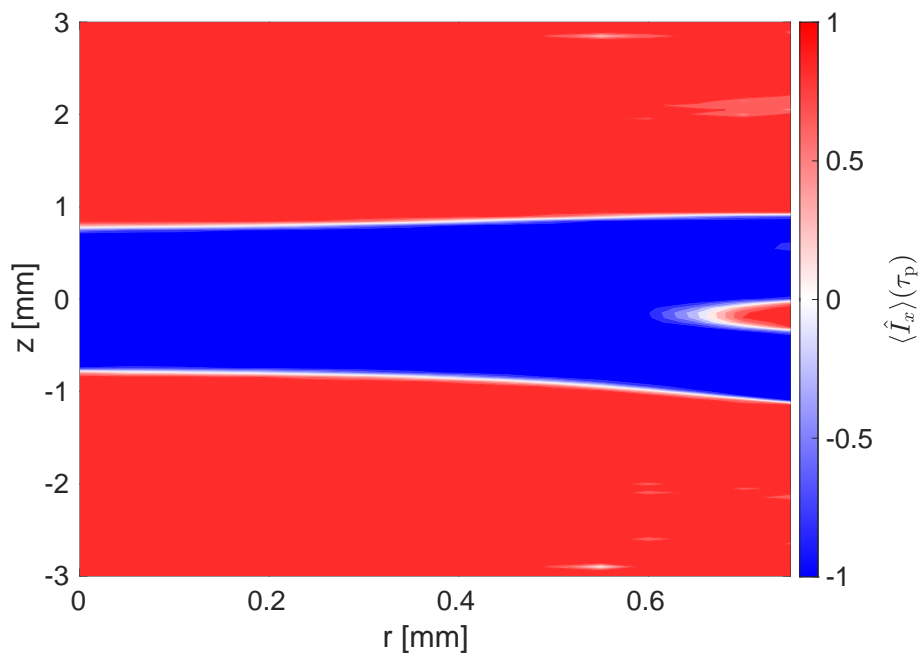

**Figure S8.** Simulated inversion profile of a 2 ms I-BURP-2 pulse in the spin-lock frame in a 1.9 mm MAS probe assuming a spinning speed of 14 kHz. The nominal rf-field amplitude was set to 100 kHz which also corresponds to the modulation frequency of the nutation-frequency selective pulse. Shown is the expectation value of the  $\hat{I}_x$  spin operator at the end of the pulse (the initial density operator was set to  $\hat{I}_x$ ). One can see that the central area of the rotor, where the rf amplitude corresponds to the nominal rf amplitude, is selectively inverted by the pulse.

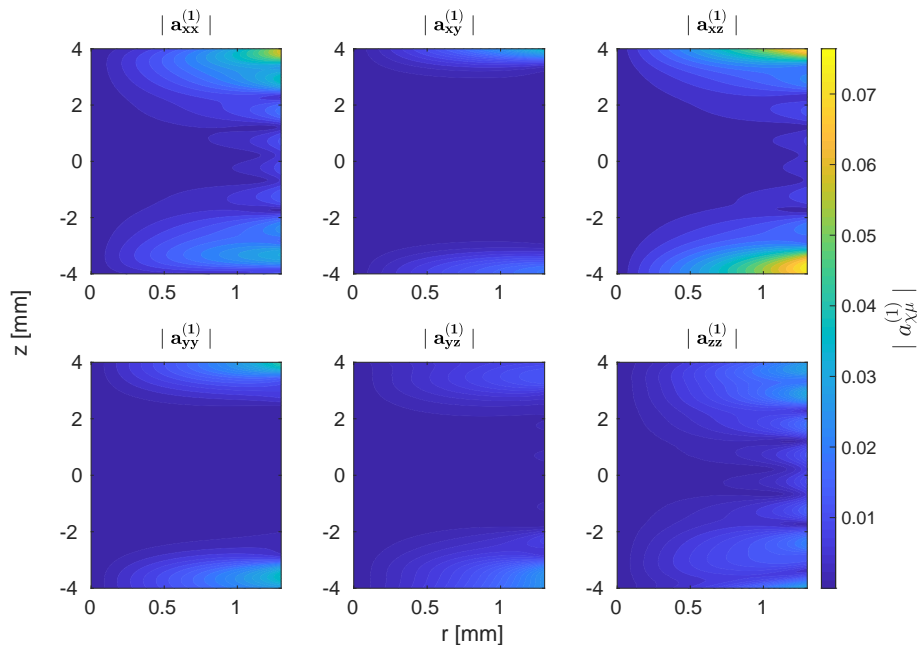

**Figure S9.** Scaling factors of the homonuclear dipolar coupling terms  $a_{\chi\mu}^{(k=1)}$  in the first-order effective Hamiltonian during FSLG decoupling as a function of the position within the sample space for a 3.2 mm MAS probe for C4. Coefficients were extracted from interaction-frame trajectories of single spin operators for a nominal rf-field strength of 125 kHz along the magic angle assuming a MAS frequency of 12.5 kHz. As the same interaction-frame trajectory was assumed for all spins, Fourier coefficients do not depend on the order of  $\chi$  and  $\mu$  ( $a_{\chi\mu}^{(k)} = a_{\mu\chi}^{(k)}$ ). The individual  $a_{\chi\mu}^{(k=1)}$  contributions to the norm shown in Fig. 13 in the main text are plotted separately to give insight into the two-spin terms that are reintroduced due to time-dependent rf modulations.
